# Supplementary material for: Supramolecular assemblies constructed from inverted cucurbit[7]uril and lanthanide cations: synthesis, structure and sorption properties
Source: Royal Society of Chemistry journal article supplement (doi:10.1039/c6ra15559f), 2016-01-01
Supplement: c6ra15559f1.pdf [file c6ra15559f1.pdf]

## Supporting Information

### **Supramolecular Assemblies Constructed from Inverted Cucurbit[7]uril and Lanthanide Cations: Synthesis, structure and sorption properties.**

Qing Li,<sup>a</sup> Sheng-Chao Qiu,<sup>a</sup> Yun-Qian Zhang,<sup>a</sup> Sai-Feng Xue,<sup>a</sup> Zhu Tao,<sup>a</sup> Timothy J. Prior,<sup>b</sup> Carl Redshaw,<sup>b\*</sup> Qian-Jiang Zhu,<sup>\*a</sup> Xin Xiao <sup>\*a</sup>

<sup>a</sup>Key Laboratory of Macrocyclic and Supramolecular Chemistry of Guizhou Province, Guizhou University, Guiyang 550025, China

<sup>b</sup>Department of Chemistry, University of Hull, Hull, HU6 7RX, U.K.

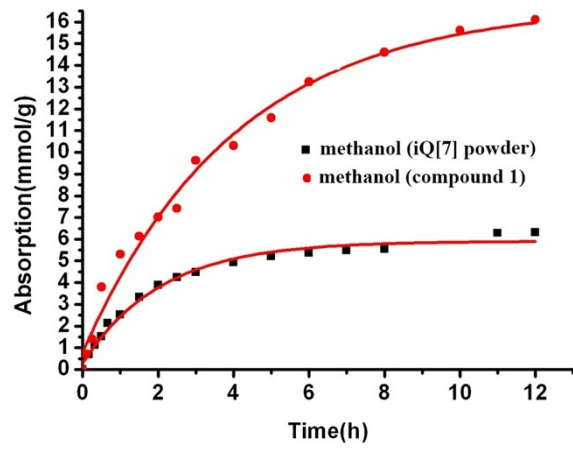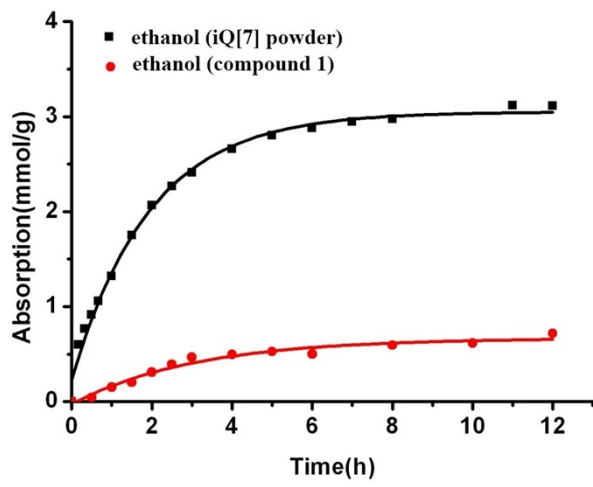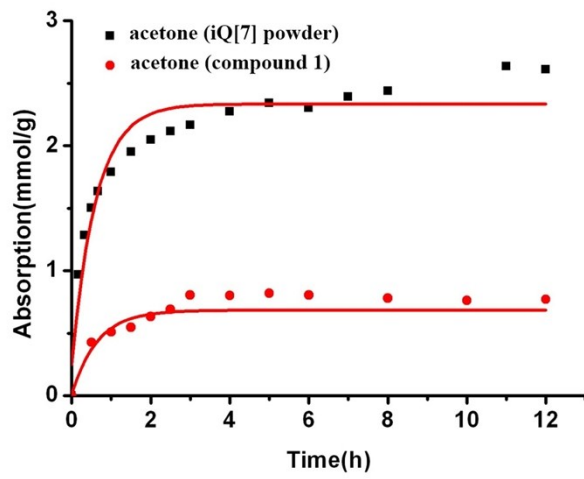

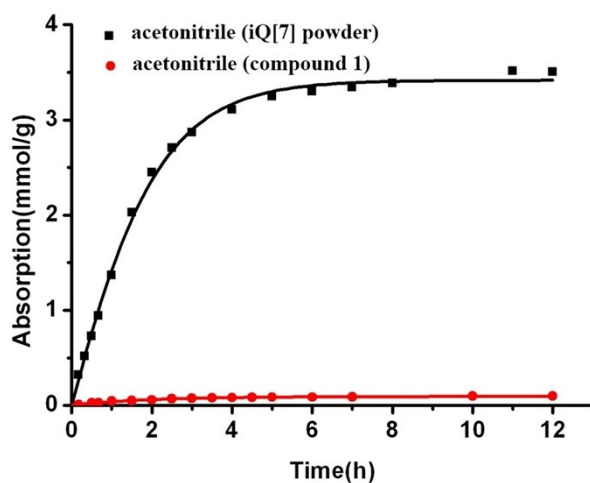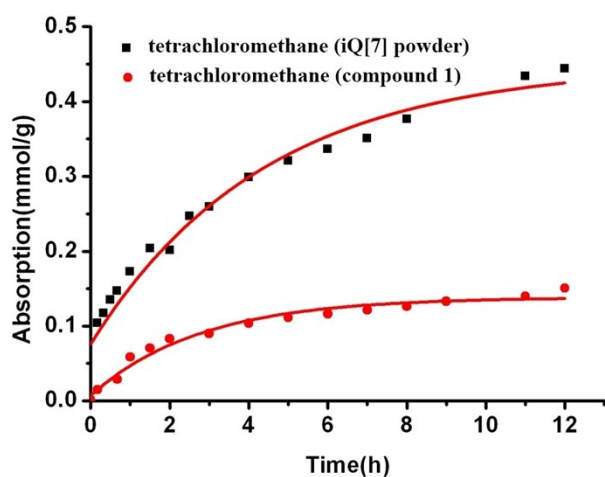

**Figure S1.** Sorption profiles of volatile materials on the *i*Q[7]-based porous supramolecular assembly compound **1** and *i*Q[7] powder: methanol, ethanol, acetone, acetonitrile and tetrachloromethane at 298 K.

**Note:** All the experiments were conducted at least 3 times and the variation of the results measured. The error margins observed were 1.2 %, 2.3 %, 2.5 %, 1.8 % or 2.1 %, for methanol, ethanol, acetone, acetonitrile and tetrachloromethane, respectively.

Inspection of crystal structures of the porous *i*Q[7] and the metal free *i*Q[7] (Isaacs: *J. Am. Chem. Soc.* 2005, 127, 18000) revealed that the portals of *i*Q[7] were sealed by Ln<sup>3+</sup> cations (Figure S2a) or neighboring *i*Q[7] molecules through the outer surface interaction (Figure S2c), thus, absorption for the volatile materials of both porous *i*Q[7] and *i*Q[7] could be mainly dependent upon the free space in porous *i*Q[7] and *i*Q[7]. The crystal structure of the porous *i*Q[7] shows that the supramolecular assembly has numerous channels constructed of zig-zag *i*Q[7]–Ln<sup>3+</sup>-based coordination polymers along the *c*-axis (Figure 1a). The aperture of each channel is constructed from four *i*Q[7] molecules, and has dimensions of length  $\sim 8 \text{ \AA}$   $\times$  width  $\sim 4 \text{ \AA}$  or with cross-sectional area of  $32 \text{ \AA}^2$  along the *a* axis (Figure S2a). By contrast, the supramolecular assembly of the metal-free *i*Q[7] along the *c*-axis exhibits fewer and smaller channels with a radius of  $\sim 2.4 \text{ \AA}$  and with cross-sectional area of  $\sim 18 \text{ \AA}^2$  (Figure S2b). Moreover, the aperture is constructed of four portals from four *i*Q[7] molecules, therefore the channels should be polar in the porous *i*Q[7], while the channels are constructed from the rears of *i*Q[7] molecules in the metal-free *i*Q[7]. Thus, the porous *i*Q[7] and the metal-free *i*Q[7] show not only different selectivity but also differing sorption capacity towards volatile materials.

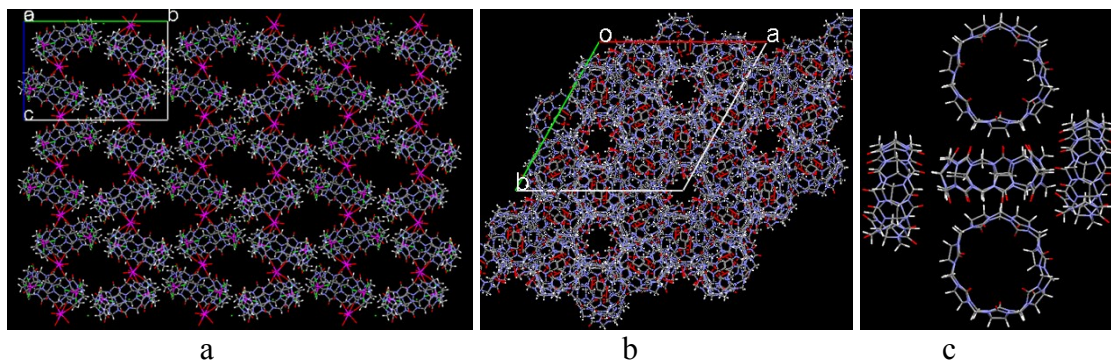

**Figure S2** Supramolecular assemblies constructed of (a) Zig-zag *i*Q[7]–Ln<sup>3+</sup>-based coordination polymers (“bee pupa”) along the *a* axis; (b) metal free *i*Q[7] molecules along the *c* axis, (c) basic arrangement of *i*Q[7] molecules in the metal free *i*Q[7].
